# Supplementary material for: Transcriptomic Analysis of the Ion Channelome of Human Platelets and Megakaryocytic Cell Lines
Source: PubMed Central journal article supplement (PMC5080539; doi:10.1160/th15-11-0891), 2016-06-09
Supplement: TH-116-02-15110891-s001.pdf [file TH-116-02-15110891-s001.pdf]

**Supplementary Data Table 1**

Quantitative PCR measurements of all ion channel-related transcripts in human platelets and three megakaryocytic cell lines

| <b>GENE NAME</b> | <b>PLT</b> | <b>SEM</b> | <b>CHRF</b> | <b>SEM</b> | <b>HEL</b> | <b>SEM</b> | <b>MEG-01</b> | <b>SEM</b> | <b>QuantiTect primer assay ID</b> |
|------------------|------------|------------|-------------|------------|------------|------------|---------------|------------|-----------------------------------|
| ABCC8            | n.d.       |            | n.d.        |            | n.d.       |            | n.d.          |            | QT00010605                        |
| ABCC9            | n.d.       |            | n.d.        |            | n.d.       |            | n.d.          |            | QT00068607                        |
| ACCN1            | n.d.       |            | n.d.        |            | n.d.       |            | n.d.          |            | QT00060830                        |
| ACCN2            | n.d.       |            | 0.00012     | 4.93E-05   | 0.00200    | 9.99E-05   | 0.00046       | 4.48E-05   | QT00042231                        |
| ACCN3            | n.d.       |            | 0.00015     | 2.14E-05   | 0.00022    | 1.03E-05   | trace         |            | QT02310581                        |
| ACCN4            | n.d.       |            | 0.00650     | 7.25E-04   | 0.00901    | 9.91E-04   | 0.00174       | 2.05E-05   | QT00015134                        |
| ACCN5            | n.d.       |            | n.d.        |            | n.d.       |            | n.d.          |            | QT00049294                        |
| ANO1             | n.d.       |            | n.d.        |            | n.d.       |            | n.d.          |            | QT00076013                        |
| ANO10            | 0.01121    | 1.61E-03   | 0.00208     | 2.72E-04   | 0.00453    | 1.10E-04   | 0.00258       | 1.76E-04   | QT01192835                        |
| ANO2             | 0.03692    | 6.03E-03   | n.d.        |            | n.d.       |            | n.d.          |            | QT00026656                        |
| ANO3             | n.d.       |            | n.d.        |            | n.d.       |            | n.d.          |            | QT00015743                        |
| ANO4             | n.d.       |            | n.d.        |            | n.d.       |            | n.d.          |            | QT00011214                        |
| ANO5             | n.d.       |            | n.d.        |            | n.d.       |            | trace         |            | QT00196980                        |
| ANO6             | 2.02019    | 5.48E-01   | 0.00360     | 3.01E-04   | 0.00307    | 2.43E-04   | 0.00142       | 3.56E-05   | QT01156603                        |
| ANO7             | n.d.       |            | n.d.        |            | n.d.       |            | n.d.          |            | QT01882755                        |
| ANO8             | trace      |            | trace       |            | trace      |            | trace         |            | QT00062559                        |
| ANO9             | n.d.       |            | n.d.        |            | n.d.       |            | n.d.          |            | QT01841196                        |
| AQP1             | trace      |            | n.d.        |            | 0.00108    | 4.25E-05   | trace         |            | QT00013237                        |
| AQP10            | 0.03358    | 1.24E-02   | 0.00049     | 2.22E-05   | 0.00132    | 4.18E-05   | trace         |            | QT00043393                        |
| AQP11            | n.d.       |            | trace       |            | trace      |            | trace         |            | QT00230636                        |
| AQP12A           | n.d.       |            | n.d.        |            | n.d.       |            | n.d.          |            | QT00236432                        |
| AQP12B           | n.d.       |            | 0.00026     | 3.80E-06   | n.d.       |            | trace         |            | QT00219331                        |
| AQP2             | n.d.       |            | n.d.        |            | trace      |            | trace         |            | QT00022757                        |
| AQP3             | n.d.       |            | 0.00263     | 3.82E-04   | 0.00050    | 1.18E-05   | 0.00202       | 1.58E-04   | QT00212996                        |
| AQP4             | n.d.       |            | n.d.        |            | n.d.       |            | n.d.          |            | QT00054761                        |
| AQP5             | n.d.       |            | n.d.        |            | n.d.       |            | n.d.          |            | QT00036099                        |
| AQP6             | n.d.       |            | n.d.        |            | n.d.       |            | n.d.          |            | QT00010633                        |

|          |         |          |         |          |         |          |         |            |            |
|----------|---------|----------|---------|----------|---------|----------|---------|------------|------------|
| AQP7     | n.d.    |          | n.d.    |          | n.d.    |          | n.d.    | QT01672006 |            |
| AQP8     | n.d.    |          | n.d.    |          | trace   |          | trace   | QT00039123 |            |
| AQP9     | n.d.    |          | n.d.    |          | n.d.    |          | n.d.    | QT00017710 |            |
| BEST1    | n.d.    |          | trace   |          | n.d.    |          | n.d.    | QT00023282 |            |
| BEST2    | n.d.    |          | n.d.    |          | n.d.    |          | n.d.    | QT00063889 |            |
| BEST3    | 0.02459 | 1.56E-03 | trace   |          | trace   |          | n.d.    | QT01884141 |            |
| BEST4    | n.d.    |          | n.d.    |          | n.d.    |          | n.d.    | QT00029638 |            |
| BSND     | n.d.    |          | n.d.    |          | n.d.    |          | n.d.    | QT00025053 |            |
| CACNA1A  | n.d.    |          | 0.00020 | 1.92E-05 | n.d.    |          | n.d.    | QT01870050 |            |
| CACNA1B  | n.d.    |          | n.d.    |          | trace   |          | n.d.    | QT00077042 |            |
| CACNA1C  | n.d.    |          | n.d.    |          | n.d.    |          | n.d.    | QT00053480 |            |
| CACNA1D  | n.d.    |          | trace   |          | n.d.    |          | n.d.    | QT00076657 |            |
| CACNA1E  | n.d.    |          | n.d.    |          | n.d.    |          | n.d.    | QT00063994 |            |
| CACNA1F  | n.d.    |          | n.d.    |          | n.d.    |          | n.d.    | QT00163093 |            |
| CACNA1G  | n.d.    |          | trace   |          | trace   |          | trace   | QT01870057 |            |
| CACNA1H  | n.d.    |          | n.d.    |          | n.d.    |          | n.d.    | QT01870064 |            |
| CACNA1I  | n.d.    |          | n.d.    |          | trace   |          | n.d.    | QT01870071 |            |
| CACNA1S  | n.d.    |          | n.d.    |          | n.d.    |          | n.d.    | QT00000833 |            |
| CACNA2D1 | n.d.    |          | n.d.    |          | n.d.    |          | trace   | QT00044968 |            |
| CACNA2D2 | n.d.    |          | n.d.    |          | n.d.    |          | n.d.    | QT00068999 |            |
| CACNA2D3 | n.d.    |          | n.d.    |          | trace   |          | n.d.    | QT00056350 |            |
| CACNA2D4 | n.d.    |          | trace   |          | trace   |          | n.d.    | QT00004592 |            |
| CACNB1   | trace   |          | trace   |          | trace   |          | trace   | QT00997808 |            |
| CACNB2   | n.d.    |          | n.d.    |          | trace   |          | n.d.    | QT00011256 |            |
| CACNB3   | n.d.    |          | 0.00024 | 6.01E-05 | 0.00086 | 1.13E-04 | 0.00005 | 3.88E-06   | QT00040922 |
| CACNB4   | n.d.    |          | n.d.    |          | n.d.    |          | trace   | QT00047600 |            |
| CACNG1   | n.d.    |          | n.d.    |          | n.d.    |          | n.d.    | QT00028301 |            |
| CACNG2   | n.d.    |          | n.d.    |          | n.d.    |          | n.d.    | QT01014517 |            |
| CACNG3   | n.d.    |          | 0.00021 | 1.01E-05 | trace   |          | trace   | QT00002919 |            |
| CACNG4   | n.d.    |          | n.d.    |          | n.d.    |          | n.d.    | QT00090048 |            |
| CACNG5   | n.d.    |          | n.d.    |          | n.d.    |          | n.d.    | QT00042245 |            |
| CACNG6   | n.d.    |          | n.d.    |          | n.d.    |          | n.d.    | QT00217441 |            |
| CACNG7   | n.d.    |          | n.d.    |          | n.d.    |          | n.d.    | QT00091315 |            |

|          |         |          |         |          |         |          |         |            |            |
|----------|---------|----------|---------|----------|---------|----------|---------|------------|------------|
| CACNG8   | n.d.    |          | trace   |          | trace   |          | n.d.    | QT00079009 |            |
| CATSPER1 | trace   |          | 0.00134 | 3.97E-05 | 0.00063 | 8.36E-05 | 0.00020 | 6.09E-06   | QT00027965 |
| CATSPER2 | n.d.    |          | 0.00013 | 3.17E-06 | 0.00077 | 7.50E-06 | 0.00025 | 5.45E-05   | QT00056637 |
| CATSPER3 | n.d.    |          | 0.00040 | 4.22E-05 | 0.00023 | 2.05E-05 | 0.00047 | 3.09E-06   | QT00064099 |
| CATSPER4 | n.d.    |          | n.d.    |          | n.d.    |          | n.d.    |            | QT00020755 |
| CCT8L2   | n.d.    |          | 0.00095 | 5.55E-05 | trace   |          | trace   |            | QT02309265 |
| CFTR     | n.d.    |          | n.d.    |          | n.d.    |          | n.d.    |            | QT00070007 |
| Chrna1   | n.d.    |          | n.d.    |          | n.d.    |          | n.d.    |            | QT00066017 |
| CHRNA2   | 0.02330 |          | n.d.    |          | n.d.    |          | n.d.    |            | QT00010997 |
| Chrna3   | n.d.    | 5.93E-03 | n.d.    |          | n.d.    |          | trace   |            | QT00015386 |
| Chrna4   | n.d.    |          | n.d.    |          | n.d.    |          | n.d.    |            | QT00003871 |
| Chrna5   | n.d.    |          | 0.00176 |          | 0.00296 |          | 0.00360 |            | QT00001071 |
| Chrna6   | n.d.    |          | n.d.    | 2.93E-05 | n.d.    | 1.06E-04 | trace   | 1.22E-04   | QT00017458 |
| Chrna7   | n.d.    |          | n.d.    |          | n.d.    |          | n.d.    |            | QT00074732 |
| Chrna9   | n.d.    |          | n.d.    |          | n.d.    |          | trace   |            | QT02589349 |
| Chrna10  | n.d.    |          | n.d.    |          | trace   |          | trace   |            | QT02589342 |
| CHRNB1   | n.d.    |          | trace   |          | trace   |          | trace   |            | QT00048867 |
| CHRNB2   | n.d.    |          | n.d.    |          | n.d.    |          | n.d.    |            | QT00001491 |
| CHRNB3   | n.d.    |          | n.d.    |          | n.d.    |          | n.d.    |            | QT00016170 |
| CHRNB4   | n.d.    |          | n.d.    |          | n.d.    |          | n.d.    |            | QT00010570 |
| CHRND    | n.d.    |          | n.d.    |          | n.d.    |          | n.d.    |            | QT00027412 |
| CHRNE    | n.d.    |          | 0.00047 | 6.20E-05 | 0.00036 | 4.72E-05 | trace   |            | QT00049644 |
| CHRNG    | n.d.    |          | n.d.    |          | n.d.    |          | n.d.    |            | QT00034587 |
| CLCA1    | n.d.    |          | n.d.    |          | n.d.    |          | 0.04487 | 1.39E-03   | QT01666889 |
| CLCA2    | n.d.    |          | n.d.    |          | trace   |          | 0.00022 | 1.76E-05   | QT00029155 |
| CLCA3    | n.d.    |          | n.d.    |          | n.d.    |          | 0.00063 | 2.40E-05   | QT00197736 |
| CLCA4    | n.d.    |          | n.d.    |          | n.d.    |          | n.d.    |            | QT00090727 |
| CLCC1    | n.d.    |          | 0.00476 | 1.81E-04 | 0.00363 | 1.29E-04 | 0.00940 | 4.80E-05   | QT00015827 |
| CLCN1    | n.d.    |          | n.d.    |          | n.d.    |          | n.d.    |            | QT00020314 |
| CLCN2    | n.d.    |          | 0.00005 | 8.05E-06 | 0.00029 | 3.79E-05 | 0.00020 | 1.10E-06   | QT00055804 |
| CLCN3    | 0.58124 | 1.39E-01 | 0.00416 | 2.03E-04 | 0.00303 | 1.56E-04 | 0.00148 | 1.01E-04   | QT00079289 |
| CLCN4    | 0.03249 | 2.56E-03 | 0.00482 | 6.24E-04 | 0.00092 | 1.14E-04 | trace   |            | QT00071008 |
| CLCN5    | n.d.    |          | trace   |          | 0.00026 | 5.95E-06 | 0.00046 | 1.17E-05   | QT00998683 |

|        |         |          |         |          |         |          |         |          |            |
|--------|---------|----------|---------|----------|---------|----------|---------|----------|------------|
| CLCN6  | trace   |          | trace   |          | 0.00048 | 9.30E-05 | 0.00034 | 2.85E-05 | QT00039277 |
| CLCN7  | trace   |          | 0.00979 | 5.03E-04 | 0.00445 | 4.41E-04 | 0.00450 | 2.32E-04 | QT00076307 |
| CLCNKA | n.d.    |          | n.d.    |          | trace   |          | n.d.    |          | QT01679258 |
| CLCNKB | n.d.    |          | n.d.    |          | n.d.    |          | n.d.    |          | QT01666854 |
| CLIC1  | 0.24101 | 3.55E-02 | 0.23383 | 1.78E-02 | 0.06624 | 3.40E-03 | 0.08270 | 5.92E-04 | QT01848833 |
| CLIC2  | n.d.    |          | 0.00045 | 7.43E-05 | 0.01550 | 4.87E-04 | 0.04991 | 5.61E-04 | QT00998711 |
| CLIC3  | trace   |          | n.d.    |          | n.d.    |          | n.d.    |          | QT00011781 |
| CLIC4  | 2.75848 | 4.81E-01 | 0.06065 | 3.79E-03 | 0.09624 | 3.47E-03 | 0.05026 | 2.29E-03 | QT02312569 |
| CLIC5  | n.d.    |          | n.d.    |          | n.d.    |          | trace   |          | QT00070910 |
| CLIC6  | n.d.    |          | n.d.    |          | n.d.    |          | trace   |          | QT00077826 |
| CLNS1A | n.d.    |          | 0.10656 | 6.11E-04 | 0.06830 | 1.55E-03 | 0.07499 | 8.96E-04 | QT00068145 |
| CNGA1  | n.d.    |          | n.d.    |          | n.d.    |          | trace   |          | QT00000875 |
| CNGA2  | n.d.    |          | trace   |          | n.d.    |          | n.d.    |          | QT00067522 |
| CNGA3  | n.d.    |          | n.d.    |          | n.d.    |          | n.d.    |          | QT00028245 |
| CNGA4  | n.d.    |          | trace   |          | n.d.    |          | n.d.    |          | QT02290519 |
| CNGB1  | n.d.    |          | trace   |          | n.d.    |          | n.d.    |          | QT00024605 |
| CNGB3  | n.d.    |          | n.d.    |          | n.d.    |          | n.d.    |          | QT00027349 |
| FXYD1  | 0.02500 | 8.52E-03 | trace   |          | trace   |          | trace   |          | QT00052038 |
| FXYD2  | n.d.    |          | trace   |          | n.d.    |          | trace   |          | QT00057841 |
| FXYD3  | n.d.    |          | n.d.    |          | n.d.    |          | n.d.    |          | QT00040061 |
| FXYD4  | n.d.    |          | n.d.    |          | n.d.    |          | n.d.    |          | QT01021055 |
| FXYD5  | 0.34529 | 9.22E-02 | 0.04246 | 9.52E-04 | 0.06749 | 5.09E-03 | 0.02944 | 8.31E-04 | QT00041489 |
| FXYD6  | n.d.    |          | n.d.    |          | n.d.    |          | trace   |          | QT00088186 |
| FXYD7  | trace   |          | 0.00116 | 9.35E-05 | trace   |          | trace   |          | QT01021041 |
| GABRA1 | n.d.    |          | n.d.    |          | n.d.    |          | n.d.    |          | QT00030002 |
| GABRA2 | n.d.    |          | 0.00032 | 6.11E-05 | trace   |          | trace   |          | QT00019376 |
| GABRA3 | n.d.    |          | trace   |          | trace   |          | n.d.    |          | QT00020636 |
| GABRA4 | n.d.    |          | n.d.    |          | n.d.    |          | n.d.    |          | QT00032046 |
| GABRA5 | n.d.    |          | n.d.    |          | n.d.    |          | n.d.    |          | QT01670109 |
| GABRA6 | n.d.    |          | n.d.    |          | trace   |          | trace   |          | QT00015596 |
| GABRB1 | n.d.    |          | n.d.    |          | n.d.    |          | n.d.    |          | QT00007455 |
| GABRB2 | n.d.    |          | trace   |          | trace   |          | trace   |          | QT00015050 |
| GABRB3 | n.d.    |          | n.d.    |          | n.d.    |          | 0.00059 | 1.38E-05 | QT00036155 |

|        |       |         |          |         |          |         |          |            |
|--------|-------|---------|----------|---------|----------|---------|----------|------------|
| GABRD  | trace | n.d.    |          | n.d.    |          | n.d.    |          | QT00019005 |
| GABRE  | n.d.  | 0.00086 | 5.08E-05 | 0.00031 | 4.96E-05 | trace   |          | QT00006349 |
| GABRG1 | n.d.  | n.d.    |          | n.d.    |          | n.d.    |          | QT00058765 |
| GABRG2 | n.d.  | n.d.    |          | n.d.    |          | n.d.    |          | QT00002905 |
| GABRG3 | n.d.  | n.d.    |          | n.d.    |          | n.d.    |          | QT01001014 |
| GABRP  | n.d.  | n.d.    |          | n.d.    |          | n.d.    |          | QT00007182 |
| GABRQ  | n.d.  | n.d.    |          | trace   |          | trace   |          | QT00038472 |
| GABRR1 | n.d.  | n.d.    |          | n.d.    |          | n.d.    |          | QT00059444 |
| GABRR2 | trace | n.d.    |          | 0.00037 | 1.38E-05 | trace   |          | QT00017038 |
| GABRR3 | n.d.  | n.d.    |          | n.d.    |          | n.d.    |          | QT00243215 |
| GJA1   | n.d.  | 0.00024 | 6.94E-05 | 0.00040 | 6.92E-06 | trace   |          | QT00012684 |
| GJA10  | n.d.  | trace   |          | n.d.    |          | trace   |          | QT01027817 |
| GJA3   | n.d.  | trace   |          | n.d.    |          | trace   |          | QT01001301 |
| GJA4   | trace | 0.01233 | 2.65E-03 | 0.00134 | 1.19E-04 | trace   |          | QT00212093 |
| GJA5   | n.d.  | 0.00042 | 2.65E-03 | 0.00152 | 1.17E-04 | trace   |          | QT01001308 |
| GJA8   | n.d.  | 0.00069 | 6.31E-05 | trace   |          | trace   |          | QT02306493 |
| GJA9   | n.d.  | 0.00084 | 1.39E-04 | trace   |          | trace   |          | QT01026543 |
| GJB1   | n.d.  | 0.00038 | 6.27E-05 | n.d.    |          | n.d.    |          | QT00213255 |
| GJB2   | n.d.  | 0.00011 | 1.50E-05 | 0.00042 | 2.46E-05 | trace   |          | QT00244531 |
| GJB3   | n.d.  | 0.00036 | 6.77E-05 | trace   |          | n.d.    |          | QT00241108 |
| GJB4   | trace | n.d.    |          | 0.00031 | 9.16E-06 | trace   |          | QT01030414 |
| GJB5   | trace | 0.00771 | 4.01E-04 | 0.00361 | 1.06E-04 | n.d.    |          | QT01001343 |
| GJB6   | n.d.  | n.d.    |          | n.d.    |          | n.d.    |          | QT00072387 |
| GJB7   | n.d.  | n.d.    |          | n.d.    |          | n.d.    |          | QT00024577 |
| GJC1   | n.d.  | 0.00085 | 4.04E-05 | trace   |          | 0.00020 | 1.82E-05 | QT00239659 |
| GJC2   | n.d.  | n.d.    |          | n.d.    |          | n.d.    |          | QT01674239 |
| GJC3   | n.d.  | 0.00021 | 2.39E-05 | 0.00033 | 3.62E-05 | trace   |          | QT00046795 |
| GJD2   | n.d.  | n.d.    |          | n.d.    |          | trace   |          | QT00493115 |
| GJD3   | n.d.  | 0.00023 | 4.16E-05 | trace   |          | n.d.    |          | QT00219415 |
| GJD4   | n.d.  | trace   |          | n.d.    |          | n.d.    |          | QT00081032 |
| GLRA1  | n.d.  | n.d.    |          | n.d.    |          | n.d.    |          | QT00020335 |
| GLRA2  | trace | n.d.    |          | n.d.    |          | n.d.    |          | QT00001645 |
| GLRA3  | n.d.  | n.d.    |          | n.d.    |          | trace   |          | QT00056749 |

|        |         |          |         |          |         |          |         |          |            |
|--------|---------|----------|---------|----------|---------|----------|---------|----------|------------|
| GLRA4  | trace   |          | n.d.    |          | n.d.    |          | n.d.    |          | QT00097706 |
| GLRB   | trace   |          | 0.00085 | 4.91E-05 | 0.00330 | 3.04E-04 | 0.00050 | 4.29E-05 | QT00008337 |
| GPM6A  | n.d.    |          | n.d.    |          | n.d.    |          | n.d.    |          | QT00013139 |
| GRIA1  | n.d.    |          | n.d.    |          | n.d.    |          | n.d.    |          | QT01001665 |
| GRIA2  | n.d.    |          | n.d.    |          | n.d.    |          | n.d.    |          | QT00008274 |
| GRIA3  | n.d.    |          | n.d.    |          | n.d.    |          | n.d.    |          | QT00050092 |
| GRIA4  | n.d.    |          | n.d.    |          | n.d.    |          | n.d.    |          | QT00072240 |
| GRID1  | n.d.    |          | n.d.    |          | trace   |          | n.d.    |          | QT00093023 |
| GRID2  | n.d.    |          | n.d.    |          | n.d.    |          | n.d.    |          | QT00084462 |
| GRIK1  | n.d.    |          | n.d.    |          | trace   |          | trace   |          | QT00080332 |
| GRIK2  | n.d.    |          | n.d.    |          | n.d.    |          | n.d.    |          | QT00016597 |
| GRIK3  | n.d.    |          | n.d.    |          | n.d.    |          | n.d.    |          | QT00001526 |
| GRIK4  | trace   |          | trace   |          | 0.00091 | 1.07E-04 | n.d.    |          | QT00099897 |
| GRIK5  | trace   |          | 0.00128 | 6.60E-06 | 0.00082 | 7.26E-06 | 0.00104 | 5.76E-05 | QT00052339 |
| GRIN1  | n.d.    |          | n.d.    |          | n.d.    |          | n.d.    |          | QT00082089 |
| GRIN2A | n.d.    |          | n.d.    |          | n.d.    |          | n.d.    |          | QT00050379 |
| GRIN2B | n.d.    |          | n.d.    |          | n.d.    |          | n.d.    |          | QT00059619 |
| GRIN2C | n.d.    |          | trace   |          | n.d.    |          | n.d.    |          | QT00051905 |
| GRIN2D | trace   |          | 0.00023 | 2.68E-05 | trace   |          | trace   |          | QT00065324 |
| GRIN3A | n.d.    |          | n.d.    |          | n.d.    |          | n.d.    |          | QT00043617 |
| GRIN3B | n.d.    |          | n.d.    |          | n.d.    |          | trace   |          | QT00055972 |
| GRINA  | trace   |          | 0.00779 | 4.80E-04 | 0.02762 | 1.15E-03 | 0.02539 | 1.73E-04 | QT00217490 |
| HCN1   | n.d.    |          | n.d.    |          | n.d.    |          | trace   |          | QT00048020 |
| HCN2   | n.d.    |          | trace   |          | n.d.    |          | trace   |          | QT01668723 |
| HCN3   | n.d.    |          | 0.00122 | 9.99E-06 | 0.00078 | 5.30E-05 | 0.00013 | 2.33E-05 | QT01672958 |
| HCN4   | n.d.    |          | n.d.    |          | n.d.    |          | n.d.    |          | QT00038108 |
| HTR3A  | n.d.    |          | n.d.    |          | n.d.    |          | n.d.    |          | QT00061397 |
| HTR3B  | n.d.    |          | n.d.    |          | n.d.    |          | n.d.    |          | QT00034538 |
| HTR3C  | n.d.    |          | n.d.    |          | n.d.    |          | n.d.    |          | QT00053543 |
| HTR3D  | n.d.    |          | 0.00114 | 1.84E-04 | trace   |          | trace   |          | QT01154118 |
| HTR3E  | n.d.    |          | n.d.    |          | n.d.    |          | n.d.    |          | QT00075047 |
| HVCN1  | trace   |          | 0.00052 | 9.44E-05 | 0.00024 | 3.98E-05 | trace   |          | QT01027558 |
| ITPR1  | 0.01537 | 1.46E-03 | 0.00192 | 5.37E-04 | 0.00105 | 5.43E-05 | 0.00045 | 1.79E-05 | QT00056490 |

|        |         |          |         |          |         |          |         |          |            |
|--------|---------|----------|---------|----------|---------|----------|---------|----------|------------|
| ITPR2  | 0.08799 | 3.44E-02 | 0.00020 | 3.17E-05 | 0.00049 | 3.24E-05 | 0.00025 | 3.00E-05 | QT01336468 |
| ITPR3  | n.d.    |          | n.d.    |          | n.d.    |          | trace   |          | QT00011865 |
| KCNA1  | n.d.    |          | 0.00040 | 1.99E-05 | n.d.    |          | n.d.    |          | QT01195733 |
| KCNA10 | n.d.    |          | 0.00054 | 7.75E-05 | n.d.    |          | trace   |          | QT00209279 |
| KCNA2  | trace   |          | n.d.    |          | n.d.    |          | trace   |          | QT00035707 |
| KCNA3  | 0.24943 | 5.35E-02 | n.d.    |          | n.d.    |          | trace   |          | QT01667918 |
| KCNA4  | n.d.    |          | 0.00021 | 4.23E-05 | n.d.    |          | n.d.    |          | QT00224112 |
| KCNA5  | n.d.    |          | 0.00057 | 4.80E-05 | trace   |          | trace   |          | QT01003177 |
| KCNA6  | n.d.    |          | trace   |          | n.d.    |          | n.d.    |          | QT00215565 |
| KCNA7  | n.d.    |          | 0.00046 | 8.82E-05 | trace   |          | n.d.    |          | QT01003184 |
| KCNAB1 | trace   |          | trace   |          | 0.00033 | 5.03E-05 | n.d.    |          | QT00031136 |
| KCNAB2 | trace   |          | 0.00311 | 2.61E-04 | 0.00574 | 2.27E-04 | 0.00015 | 2.31E-05 | QT00051961 |
| KCNAB3 | trace   |          | trace   |          | 0.00026 | 3.58E-05 | trace   |          | QT00056931 |
| KCNB1  | n.d.    |          | n.d.    |          | n.d.    |          | n.d.    |          | QT00014749 |
| KCNB2  | n.d.    |          | n.d.    |          | n.d.    |          | n.d.    |          | QT00002688 |
| KCNC1  | n.d.    |          | 0.00043 | 7.22E-05 | trace   |          | trace   |          | QT00213780 |
| KCNC2  | n.d.    |          | n.d.    |          | n.d.    |          | n.d.    |          | QT00007427 |
| KCNC3  | n.d.    |          | n.d.    |          | n.d.    |          | n.d.    |          | QT00074081 |
| KCNC4  | n.d.    |          | trace   |          | 0.00021 | 8.26E-06 | trace   |          | QT01669150 |
| KCND1  | n.d.    |          | 0.00049 | 3.73E-05 | 0.00039 | 4.35E-05 | 0.00017 | 1.05E-05 | QT00010773 |
| KCND2  | n.d.    |          | n.d.    |          | n.d.    |          | n.d.    |          | QT01870414 |
| KCND3  | n.d.    |          | n.d.    |          | n.d.    |          | n.d.    |          | QT00050400 |
| KCNE1  | n.d.    |          | n.d.    |          | n.d.    |          | n.d.    |          | QT01003226 |
| KCNE1L | n.d.    |          | 0.00073 | 3.20E-05 | 0.00145 | 3.93E-04 | trace   |          | QT00236194 |
| KCNE2  | trace   |          | 0.00050 | 1.22E-06 | 0.00019 | 2.85E-05 | trace   |          | QT00100044 |
| KCNE3  | 0.09149 | 1.65E-02 | 0.00568 | 3.10E-04 | 0.01053 | 2.92E-04 | 0.00081 | 7.73E-05 | QT00093870 |
| KCNE4  | n.d.    |          | 0.00024 | 2.39E-05 | n.d.    |          | trace   |          | QT00046676 |
| KCNF1  | n.d.    |          | n.d.    |          | n.d.    |          | n.d.    |          | QT00201243 |
| KCNG1  | n.d.    |          | n.d.    |          | n.d.    |          | n.d.    |          | QT00205324 |
| KCNG2  | n.d.    |          | trace   |          | trace   |          | trace   |          | QT01018430 |
| KCNG3  | n.d.    |          | 0.00073 | 8.78E-05 | n.d.    |          | trace   |          | QT01032395 |
| KCNG4  | trace   |          | n.d.    |          | n.d.    |          | n.d.    |          | QT00053487 |
| KCNH1  | n.d.    |          | trace   |          | n.d.    |          | n.d.    |          | QT00092127 |

|        |       |         |          |         |          |         |          |            |
|--------|-------|---------|----------|---------|----------|---------|----------|------------|
| KCNH2  | n.d.  | 0.00083 | 2.72E-05 | 0.00309 | 1.65E-04 | 0.00435 | 1.17E-04 | QT01003254 |
| KCNH3  | n.d.  | n.d.    |          | n.d.    |          | n.d.    |          | QT00011753 |
| KCNH4  | n.d.  | n.d.    |          | trace   |          | trace   |          | QT00042497 |
| KCNH5  | n.d.  | n.d.    |          | n.d.    |          | n.d.    |          | QT00007406 |
| KCNH6  | n.d.  | n.d.    |          | n.d.    |          | n.d.    |          | QT00065072 |
| KCNH7  | n.d.  | n.d.    |          | n.d.    |          | n.d.    |          | QT00080283 |
| KCNH8  | n.d.  | n.d.    |          | n.d.    |          | n.d.    |          | QT00066647 |
| KCNIP1 | n.d.  | n.d.    |          | trace   |          | n.d.    |          | QT00078050 |
| KCNIP2 | n.d.  | n.d.    |          | n.d.    |          | n.d.    |          | QT00016254 |
| KCNIP3 | n.d.  | n.d.    |          | n.d.    |          | trace   |          | QT00060564 |
| KCNIP4 | n.d.  | n.d.    |          | n.d.    |          | n.d.    |          | QT01026298 |
| KCNJ1  | n.d.  | trace   |          | n.d.    |          | n.d.    |          | QT01003275 |
| KCNJ10 | n.d.  | n.d.    |          | n.d.    |          | n.d.    |          | QT00059031 |
| KCNJ11 | n.d.  | 0.00021 | 6.27E-05 | 0.00077 | 4.18E-05 | 0.00023 | 1.08E-05 | QT00216475 |
| KCNJ12 | n.d.  | n.d.    |          | n.d.    |          | n.d.    |          | QT01668317 |
| KCNJ13 | n.d.  | n.d.    |          | n.d.    |          | n.d.    |          | QT00229257 |
| KCNJ14 | n.d.  | trace   |          | n.d.    |          | n.d.    |          | QT00207452 |
| KCNJ15 | n.d.  | 0.00249 | 2.88E-04 | 0.00056 | 6.90E-05 | 0.00004 | 4.36E-06 | QT00062447 |
| KCNJ16 | n.d.  | n.d.    |          | n.d.    |          | trace   |          | QT00071687 |
| KCNJ2  | n.d.  | n.d.    |          | n.d.    |          | n.d.    |          | QT00001022 |
| KCNJ3  | n.d.  | n.d.    |          | trace   |          | n.d.    |          | QT00030380 |
| KCNJ4  | n.d.  | 0.00115 | 6.78E-05 | 0.00040 | 2.60E-05 | n.d.    |          | QT00201845 |
| KCNJ5  | n.d.  | trace   |          | n.d.    |          | n.d.    |          | QT00070406 |
| KCNJ6  | n.d.  | trace   |          | n.d.    |          | n.d.    |          | QT00010444 |
| KCNJ8  | n.d.  | 0.00055 | 1.02E-04 | 0.00122 | 4.42E-05 | 0.00060 | 5.87E-05 | QT01157996 |
| KCNJ9  | n.d.  | n.d.    |          | n.d.    |          | n.d.    |          | QT00011935 |
| KCNK1  | trace | n.d.    |          | 0.00014 | 2.19E-05 | 0.00813 | 1.22E-04 | QT00039396 |
| KCNK10 | n.d.  | n.d.    |          | n.d.    |          | n.d.    |          | QT00038899 |
| KCNK12 | n.d.  | n.d.    |          | n.d.    |          | n.d.    |          | QT00209258 |
| KCNK13 | n.d.  | 0.00046 | 9.16E-05 | trace   |          | trace   |          | QT00232708 |
| KCNK15 | n.d.  | n.d.    |          | n.d.    |          | n.d.    |          | QT00238658 |
| KCNK16 | n.d.  | n.d.    |          | n.d.    |          | n.d.    |          | QT00043666 |
| KCNK17 | trace | 0.01814 | 1.46E-03 | 0.00408 | 7.40E-04 | trace   |          | QT00036470 |



|        |         |          |         |          |         |          |         |          |            |
|--------|---------|----------|---------|----------|---------|----------|---------|----------|------------|
| KCNK18 | n.d.    |          | 0.00083 | 7.49E-05 | trace   |          | trace   |          | QT01034348 |
| KCNK2  | n.d.    |          | n.d.    |          | n.d.    |          | n.d.    |          | QT00080710 |
| KCNK3  | n.d.    |          | trace   |          | n.d.    |          | n.d.    |          | QT00201264 |
| KCNK4  | n.d.    |          | trace   |          | n.d.    |          | n.d.    |          | QT01670151 |
| KCNK5  | n.d.    |          | 0.00293 | 3.47E-04 | 0.00323 | 9.50E-05 | 0.00124 | 2.86E-05 | QT00069188 |
| KCNK6  | 0.03477 | 8.35E-03 | 0.00149 | 2.06E-04 | 0.00263 | 8.56E-05 | 0.00189 | 2.62E-05 | QT00210791 |
| KCNK7  | n.d.    |          | n.d.    |          | n.d.    |          | trace   |          | QT01674127 |
| KCNK9  | n.d.    |          | 0.00057 | 1.13E-04 | trace   |          | trace   |          | QT01020369 |
| KCNMA1 | trace   |          | n.d.    |          | trace   |          | n.d.    |          | QT00024157 |
| KCNMB1 | 0.02491 | 9.26E-03 | 0.00061 | 3.31E-05 | 0.00077 | 1.02E-05 | n.d.    |          | QT00080493 |
| KCNMB2 | n.d.    |          | n.d.    |          | trace   |          | n.d.    |          | QT00083097 |
| KCNMB3 | trace   |          | 0.00201 | 1.29E-04 | 0.00048 | 1.95E-05 | 0.00042 | 4.62E-06 | QT00094276 |
| KCNMB4 | 0.00925 | 2.78E-03 | 0.00081 | 1.21E-04 | 0.00141 | 1.05E-04 | 0.00010 | 1.78E-05 | QT00097496 |
| KCNN1  | n.d.    |          | 0.00093 | 5.36E-05 | 0.00028 | 3.33E-05 | trace   |          | QT00025375 |
| KCNN2  | n.d.    |          | trace   |          | trace   |          | trace   |          | QT00016611 |
| KCNN3  | trace   |          | trace   |          | trace   |          | n.d.    |          | QT00070966 |
| KCNN4  | n.d.    |          | 0.00107 | 1.43E-05 | 0.00474 | 6.64E-04 | 0.01038 | 1.60E-04 | QT00003780 |
| KCNQ1  | n.d.    |          | 0.00031 | 3.48E-05 | n.d.    |          | n.d.    |          | QT00016065 |
| KCNQ2  | n.d.    |          | n.d.    |          | n.d.    |          | n.d.    |          | QT00036463 |
| KCNQ3  | n.d.    |          | n.d.    |          | n.d.    |          | n.d.    |          | QT00053865 |
| KCNQ4  | trace   |          | n.d.    |          | 0.00028 | 7.87E-05 | 0.00028 | 1.60E-05 | QT00073066 |
| KCNQ5  | n.d.    |          | n.d.    |          | 0.00198 | 1.44E-04 | 0.00205 | 3.05E-05 | QT00028280 |
| KCNRG  | trace   |          | n.d.    |          | trace   |          | n.d.    |          | QT00229999 |
| KCNS1  | n.d.    |          | n.d.    |          | n.d.    |          | n.d.    |          | QT00019621 |
| KCNS2  | n.d.    |          | trace   |          | n.d.    |          | trace   |          | QT00219170 |
| KCNS3  | n.d.    |          | trace   |          | trace   |          | trace   |          | QT00061411 |
| KCNT1  | n.d.    |          | n.d.    |          | n.d.    |          | n.d.    |          | QT00017801 |
| KCNT2  | trace   |          | n.d.    |          | trace   |          | n.d.    |          | QT00063707 |
| KCNU1  | n.d.    |          | n.d.    |          | n.d.    |          | n.d.    |          | QT01666651 |
| KCNV1  | n.d.    |          | n.d.    |          | trace   |          | 0.00022 | 2.86E-05 | QT00004487 |
| KCNV2  | n.d.    |          | 0.00169 | 3.59E-05 | 0.00066 | 6.70E-05 | n.d.    |          | QT01032304 |
| KCTD1  | n.d.    |          | n.d.    |          | trace   |          | n.d.    |          | QT00096565 |
| KCTD10 | 0.03547 | 9.84E-03 | 0.00056 | 5.51E-05 | 0.00137 | 4.28E-05 | 0.00111 | 2.93E-05 | QT00088746 |

|         |         |          |         |          |         |          |         |          |            |
|---------|---------|----------|---------|----------|---------|----------|---------|----------|------------|
| KCTD11  | trace   |          | 0.00004 | 2.04E-06 | 0.00001 | 1.22E-06 | 0.00011 | 2.01E-05 | QT01031394 |
| KCTD12  | n.d.    |          | 0.00298 | 1.47E-04 | 0.00031 | 6.04E-05 | 0.00191 | 5.87E-05 | QT00204771 |
| KCTD13  | 0.01560 | 3.88E-03 | 0.00287 | 2.74E-04 | 0.00448 | 2.28E-04 | 0.00321 | 3.35E-04 | QT01033270 |
| KCTD14  | n.d.    |          | 0.00045 | 1.04E-04 | 0.00019 | 1.21E-05 | 0.00043 | 6.80E-05 | QT00200872 |
| KCTD15  | n.d.    |          | 0.00073 | 1.00E-04 | 0.02099 | 3.79E-04 | 0.01156 | 3.46E-04 | QT00028168 |
| KCTD16  | n.d.    |          | 0.00079 | 1.63E-04 | trace   |          | 0.00006 | 7.31E-06 | QT00231560 |
| KCTD17  | n.d.    |          | n.d.    |          | n.d.    |          | trace   |          | QT00091798 |
| KCTD18  | 0.02210 | 2.86E-03 | 0.00151 | 7.49E-05 | 0.00180 | 5.91E-05 | 0.00086 | 1.70E-04 | QT00048251 |
| KCTD19  | n.d.    |          | n.d.    |          | trace   |          | trace   |          | QT01152921 |
| KCTD2   | 0.01617 | 2.93E-03 | 0.00095 | 1.83E-04 | 0.00148 | 7.49E-05 | 0.00144 | 5.17E-05 | QT00071470 |
| KCTD20  | 0.05130 | 4.07E-03 | 0.00047 | 4.10E-05 | 0.00080 | 8.45E-05 | 0.00119 | 3.53E-05 | QT00046928 |
| KCTD21  | n.d.    |          | 0.00142 | 5.90E-05 | 0.00114 | 1.62E-04 | 0.00142 | 3.83E-05 | QT00235060 |
| KCTD3   | n.d.    |          | 0.00128 | 1.14E-04 | 0.00198 | 1.12E-04 | 0.00081 | 2.89E-05 | QT00041517 |
| KCTD4   | n.d.    |          | 0.00055 | 5.43E-05 | 0.00015 | 2.34E-05 | n.d.    |          | QT00201222 |
| KCTD5   | trace   |          | 0.00153 | 9.42E-05 | 0.00167 | 5.41E-05 | 0.00157 | 1.05E-04 | QT00011564 |
| KCTD6   | n.d.    |          | 0.00050 | 4.98E-05 | 0.00059 | 7.98E-06 | 0.00057 | 4.87E-05 | QT00200746 |
| KCTD7   | trace   |          | n.d.    |          | trace   |          | trace   |          | QT00085267 |
| KCTD8   | n.d.    |          | n.d.    |          | n.d.    |          | n.d.    |          | QT00084441 |
| KCTD9   | 0.00441 | 2.65E-04 | 0.00250 | 6.35E-05 | 0.00363 | 1.47E-04 | 0.00207 | 1.98E-04 | QT01670046 |
| LRRRC8A | n.d.    |          | 0.00069 | 8.79E-05 | 0.00069 | 5.66E-06 | 0.00083 | 1.97E-04 | QT01023302 |
| LRRRC8B | 0.20202 | 7.60E-02 | 0.00266 | 2.42E-04 | 0.00328 | 1.81E-04 | 0.00432 | 8.27E-04 | QT01017450 |
| LRRRC8C | n.d.    |          | 0.00028 | 3.62E-05 | 0.00052 | 1.88E-05 | 0.00162 | 6.36E-05 | QT00055720 |
| LRRRC8D | n.d.    |          | 0.00187 | 7.10E-05 | 0.00224 | 9.67E-05 | 0.00280 | 6.54E-05 | QT01679202 |
| LRRRC8E | n.d.    |          | n.d.    |          | trace   |          | trace   |          | QT00079639 |
| MCOLN1  | n.d.    |          | 0.00177 | 7.61E-05 | 0.00330 | 1.05E-04 | 0.00228 | 4.51E-05 | QT00094234 |
| MCOLN2  | n.d.    |          | trace   |          | 0.00337 | 4.66E-04 | trace   |          | QT00072849 |
| MCOLN3  | n.d.    |          | n.d.    |          | n.d.    |          | n.d.    |          | QT00100835 |
| NALCN   | n.d.    |          | 0.00022 | 4.52E-05 | trace   |          | n.d.    |          | QT00096537 |
| ORAI1   | 0.12405 | 2.45E-02 | 0.00435 | 9.17E-04 | 0.00289 | 3.20E-04 | 0.00142 | 3.10E-05 | QT00202587 |
| ORAI2   | trace   |          | trace   |          | trace   |          | trace   |          | QT00215229 |
| ORAI3   | n.d.    |          | 0.00671 | 2.57E-04 | 0.00333 | 1.66E-05 | 0.00092 | 9.60E-06 | QT00231910 |
| P2RX1   | 0.39701 | 1.75E-01 | 0.00659 | 2.82E-04 | 0.00232 | 2.52E-04 | 0.00069 | 2.95E-05 | QT00009240 |
| P2RX2   | n.d.    |          | n.d.    |          | n.d.    |          | n.d.    |          | QT00493682 |

|        |         |          |         |          |         |          |         |            |            |
|--------|---------|----------|---------|----------|---------|----------|---------|------------|------------|
| P2RX3  | n.d.    |          | n.d.    |          | n.d.    |          | n.d.    | QT00026446 |            |
| P2RX4  | trace   |          | 0.00778 | 1.48E-03 | 0.00136 | 5.10E-05 | 0.00289 | 4.28E-05   | QT00049693 |
| P2RX5  | n.d.    |          | n.d.    |          | 0.00170 | 9.92E-05 | 0.00128 | 1.20E-04   | QT00057785 |
| P2RX6  | trace   |          | trace   |          | 0.00005 | 1.28E-05 | n.d.    |            | QT00018949 |
| P2RX7  | n.d.    |          | 0.00088 | 7.24E-05 | 0.00053 | 2.99E-05 | 0.00060 | 1.25E-04   | QT00083643 |
| PANX1  | 0.11326 | 3.34E-02 | trace   |          | 0.00017 | 5.19E-06 | trace   |            | QT00085925 |
| PANX2  | n.d.    |          | 0.00040 | 7.35E-05 | trace   |          | n.d.    |            | QT00219359 |
| PANX3  | n.d.    |          | n.d.    |          | trace   |          | n.d.    |            | QT00016884 |
| PIEZO1 | trace   |          | 0.00505 | 1.16E-04 | 0.01099 | 2.44E-03 | 0.00884 | 8.79E-05   | QT00088403 |
| PIEZO2 | n.d.    |          | n.d.    |          | 0.00150 | 3.10E-04 | 0.00687 | 2.59E-04   | QT02359623 |
| PKD1   | trace   |          | 0.02618 | 4.94E-04 | 0.00675 | 1.23E-03 | 0.00732 | 6.07E-05   | QT00013132 |
| PKD1L1 | n.d.    |          | n.d.    |          | trace   |          | n.d.    |            | QT00044429 |
| PKD1L2 | n.d.    |          | n.d.    |          | n.d.    |          | n.d.    |            | QT00059094 |
| PKD1L3 | n.d.    |          | trace   |          | n.d.    |          | n.d.    |            | QT00067662 |
| PKD2   | n.d.    |          | 0.00161 | 2.37E-05 | 0.00248 | 1.84E-04 | 0.00100 | 2.56E-05   | QT00027853 |
| PKD2L1 | n.d.    |          | n.d.    |          | n.d.    |          | n.d.    |            | QT00037667 |
| PKD2L2 | n.d.    |          | n.d.    |          | n.d.    |          | n.d.    |            | QT00038675 |
| PKDREJ | n.d.    |          | n.d.    |          | n.d.    |          | trace   |            | QT00215901 |
| RYR1   | n.d.    |          | trace   |          | 0.00019 | 3.03E-05 | n.d.    |            | QT00079002 |
| RYR2   | n.d.    |          | n.d.    |          | trace   |          | 0.00016 | 1.79E-05   | QT00018368 |
| RYR3   | n.d.    |          | n.d.    |          | trace   |          | trace   |            | QT00092456 |
| SCN10A | n.d.    |          | n.d.    |          | n.d.    |          | n.d.    |            | QT01008028 |
| SCN11A | n.d.    |          | n.d.    |          | trace   |          | n.d.    |            | QT01016344 |
| SCN1A  | n.d.    |          | n.d.    |          | n.d.    |          | n.d.    |            | QT02308355 |
| SCN1B  | trace   |          | n.d.    |          | trace   |          | n.d.    |            | QT00066080 |
| SCN2A  | n.d.    |          | trace   |          | trace   |          | trace   |            | QT00070707 |
| SCN2B  | n.d.    |          | 0.00049 | 9.14E-05 | trace   |          | trace   |            | QT01667687 |
| SCN3A  | n.d.    |          | n.d.    |          | trace   |          | n.d.    |            | QT01671264 |
| SCN3B  | trace   |          | n.d.    |          | n.d.    |          | n.d.    |            | QT00002184 |
| SCN4A  | n.d.    |          | n.d.    |          | n.d.    |          | 0.00011 | 5.65E-06   | QT00009765 |
| SCN4B  | n.d.    |          | n.d.    |          | n.d.    |          | n.d.    |            | QT00011802 |
| SCN5A  | trace   |          | n.d.    |          | 0.00010 | 2.57E-06 | trace   |            | QT00091812 |
| SCN7A  | n.d.    |          | n.d.    |          | n.d.    |          | n.d.    |            | QT00034132 |

|         |         |          |         |          |         |          |         |          |            |
|---------|---------|----------|---------|----------|---------|----------|---------|----------|------------|
| SCN8A   | n.d.    |          | n.d.    |          | n.d.    |          | n.d.    |          | QT00020923 |
| SCN9A   | n.d.    |          | 0.00015 | 3.28E-05 | 0.00195 | 6.23E-04 | 0.00034 | 2.61E-05 | QT00001505 |
| SCNN1A  | trace   |          | n.d.    |          | trace   |          | n.d.    |          | QT00022883 |
| SCNN1B  | n.d.    |          | n.d.    |          | n.d.    |          | n.d.    |          | QT00051597 |
| SCNN1D  | n.d.    |          | n.d.    |          | n.d.    |          | n.d.    |          | QT00086051 |
| SCNN1G  | n.d.    |          | n.d.    |          | n.d.    |          | n.d.    |          | QT00063217 |
| STIM1   | 0.08587 | 1.96E-02 | 0.00877 | 1.06E-03 | 0.00310 | 3.71E-04 | 0.00080 | 1.96E-05 | QT00083538 |
| STIM2   | trace   |          | 0.00539 | 2.71E-04 | 0.00294 | 1.53E-04 | 0.00227 | 7.55E-05 | QT00023744 |
| STX1B   | trace   |          | n.d.    |          | n.d.    |          | trace   |          | QT00058793 |
| TMEM109 | 0.00677 | 6.33E-04 | 0.00187 | 6.36E-05 | 0.00358 | 2.47E-04 | 0.00396 | 6.33E-05 | QT00004571 |
| TMEM37  | n.d.    |          | 0.00029 | 3.38E-05 | trace   |          | trace   |          | QT01530361 |
| TMEM38A | n.d.    |          | trace   |          | n.d.    |          | n.d.    |          | QT00063931 |
| TMEM38B | n.d.    |          | 0.01118 | 5.71E-05 | 0.00867 | 8.50E-04 | 0.01184 | 1.84E-04 | QT00054208 |
| TNFAIP1 | n.d.    |          | n.d.    |          | n.d.    |          | trace   |          | QT00013216 |
| TOMM40  | n.d.    |          | 0.03045 | 1.25E-03 | 0.03004 | 1.65E-03 | 0.05683 | 3.82E-04 | QT01674099 |
| TPCN1   | trace   |          | 0.00290 | 2.38E-05 | 0.00157 | 7.29E-05 | 0.00182 | 4.57E-05 | QT00088760 |
| TPCN2   | n.d.    |          | 0.00037 | 2.88E-05 | 0.00070 | 5.77E-06 | 0.00030 | 2.65E-05 | QT00084763 |
| TRPA1   | n.d.    |          | n.d.    |          | n.d.    |          | n.d.    |          | QT00026054 |
| TRPC1   | n.d.    |          | 0.00012 | 1.04E-05 | 0.00367 | 7.82E-05 | 0.00011 | 2.04E-06 | QT01009771 |
| TRPC3   | n.d.    |          | 0.00050 | 8.99E-06 | trace   |          | 0.00010 | 2.23E-06 | QT00025025 |
| TRPC4   | n.d.    |          | n.d.    |          | n.d.    |          | n.d.    |          | QT00046081 |
| TRPC5   | n.d.    |          | n.d.    |          | n.d.    |          | n.d.    |          | QT00019488 |
| TRPC6   | 0.05003 | 2.47E-02 | 0.00279 | 4.85E-04 | n.d.    |          | n.d.    |          | QT00037660 |
| TRPC7   | n.d.    |          | trace   |          | n.d.    |          | n.d.    |          | QT00030898 |
| TRPM1   | n.d.    |          | n.d.    |          | n.d.    |          | n.d.    |          | QT00031087 |
| TRPM2   | n.d.    |          | 0.00041 | 5.83E-05 | trace   |          | trace   |          | QT01870407 |
| TRPM3   | n.d.    |          | n.d.    |          | trace   |          | n.d.    |          | QT00009940 |
| TRPM4   | n.d.    |          | 0.00054 | 4.21E-05 | 0.00028 | 4.29E-05 | trace   |          | QT00069545 |
| TRPM5   | n.d.    |          | n.d.    |          | n.d.    |          | n.d.    |          | QT00034734 |
| TRPM6   | n.d.    |          | n.d.    |          | trace   |          | 0.00083 | 4.75E-05 | QT00043456 |
| TRPM7   | n.d.    |          | 0.00137 | 8.92E-05 | 0.00207 | 3.93E-04 | 0.00043 | 2.91E-05 | QT00082425 |
| TRPM8   | n.d.    |          | n.d.    |          | n.d.    |          | n.d.    |          | QT00038906 |
| TRPV1   | n.d.    |          | 0.00062 | 2.67E-05 | 0.00035 | 2.90E-05 | trace   |          | QT00046109 |

|              |         |          |         |          |         |          |         |          |            |
|--------------|---------|----------|---------|----------|---------|----------|---------|----------|------------|
| TRPV2        | n.d.    |          | 0.00456 | 6.80E-05 | 0.00884 | 4.09E-04 | 0.00533 | 4.39E-05 | QT00035987 |
| TRPV3        | n.d.    |          | 0.00115 | 1.92E-04 | trace   |          | trace   |          | QT00070448 |
| TRPV4        | n.d.    |          | n.d.    |          | n.d.    |          | n.d.    |          | QT00077217 |
| TRPV5        | n.d.    |          | n.d.    |          | n.d.    |          | trace   |          | QT00029442 |
| TRPV6        | n.d.    |          | n.d.    |          | n.d.    |          | n.d.    |          | QT00040096 |
| TTYH1        | n.d.    |          | n.d.    |          | trace   |          | n.d.    |          | QT00035882 |
| TTYH2        | n.d.    |          | n.d.    |          | n.d.    |          | n.d.    |          | QT00007504 |
| TTYH3        | n.d.    |          | n.d.    |          | n.d.    |          | n.d.    |          | QT00058191 |
| VDAC1        | n.d.    |          | 0.00214 | 6.05E-04 | 0.00218 | 4.79E-05 | 0.02448 | 9.79E-03 | QT00092680 |
| VDAC2        | 0.05271 | 1.35E-02 | 0.09444 | 1.23E-02 | 0.06112 | 2.36E-04 | 0.03147 | 3.69E-04 | QT01670949 |
| VDAC3        | 0.64516 | 2.04E-01 | 0.04650 | 4.28E-03 | 0.04116 | 8.82E-04 | 0.08594 | 1.51E-03 | QT01678341 |
| ZACN         | n.d.    |          | n.d.    |          | n.d.    |          | n.d.    |          | QT01678950 |
| GAPDH        | NA      |          | NA      |          | NA      |          | NA      |          | QT01192646 |
| PTPRC [CD45] | NA      |          | NA      |          | NA      |          | NA      |          | QT01869931 |
| GYPA         | NA      |          | NA      |          | NA      |          | NA      |          | QT00053109 |
| GPIBB        | NA      |          | NA      |          | NA      |          | NA      |          | QT01001441 |

Values represent expression levels relative to GAPDH, calculated as described in the methods section, for platelets (PLT), MEG-01, CHRF-288-11 (CHRF) and HEL cells.

n.d., not detected; trace, gene detected at a level above background but insufficient for quantification.

Values represent the mean +/- SEM from 4 donors (platelets) or 3 separate batches of each cell line.

The QuantiTect assay identification number (Qiagen) for each gene is shown in the far right column.
